# Supplementary material for: Combining Culture-Dependent and Culture-Independent Methods: New Methodology Insight on the Vibrio Community of Ruditapes philippinarum
Source: MDPI journal article supplement (doi:10.3390/foods10061271), 2021-06-03
Supplement: s1 [file s1]

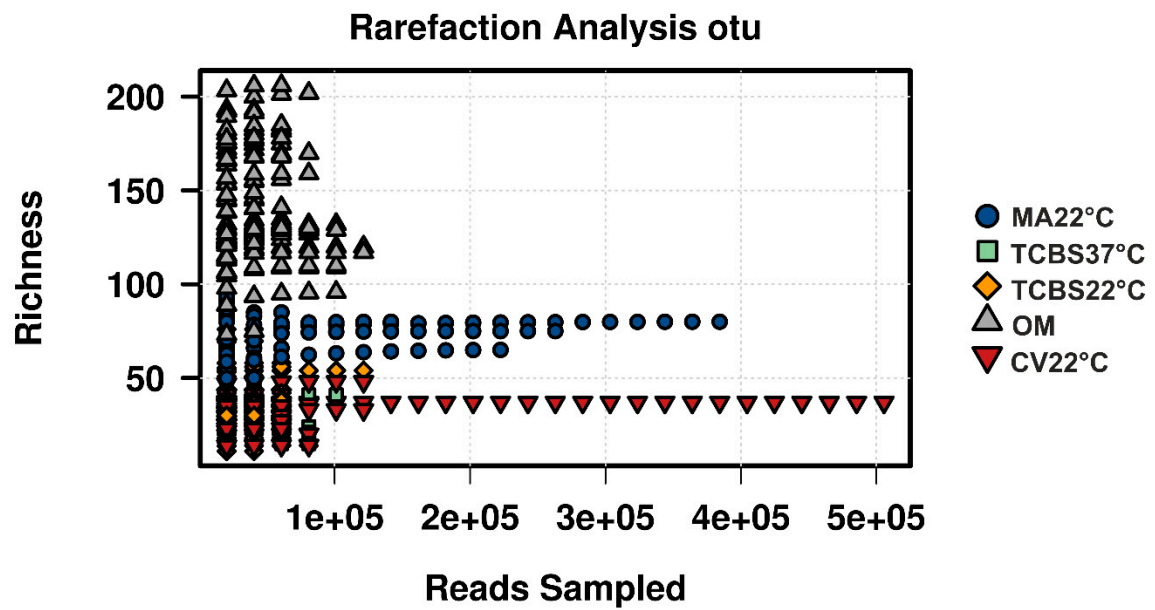

**Figure S1.** Rarefaction curve of homogenate and plated clam samples reads obtained by 16S sequencing. OM: Homogenate clam samples; MA 22 °C: clam samples plated on marine agar and incubated at 22 °C; TCBS 22 °C: clam samples plated on Thiosulfate-citrate-bile salts-sucrose agar and incubated at 22 °C; CV 22 °C: clam samples plated on CHROMagar Vibrio media and incubated at 22 °C.

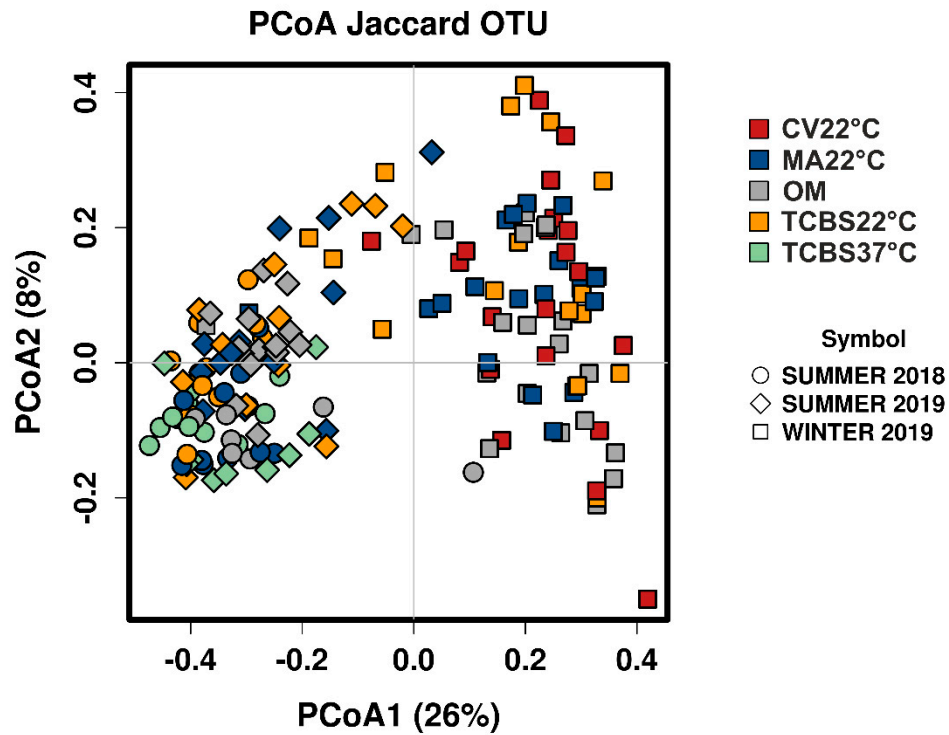

**Figure S2.** *recA-pyrH* amplicon-based microbial principal coordinate analysis (PCoA) representation of homogenate and plated clam samples according to Jaccard index. In PCoA representation, the season factor corresponding to the collection time of clam samples is also reported. OM: Homogenate clam samples; MA 22 °C: clam samples plated on marine agar and incubated at 22 °C; TCBS 22 °C: clam samples plated on thiosulfate-citrate-bile salts-sucrose agar and incubated at 22 °C; CV 22 °C: clam samples plated on CHROMagar Vibrio media and incubated at 22 °C.

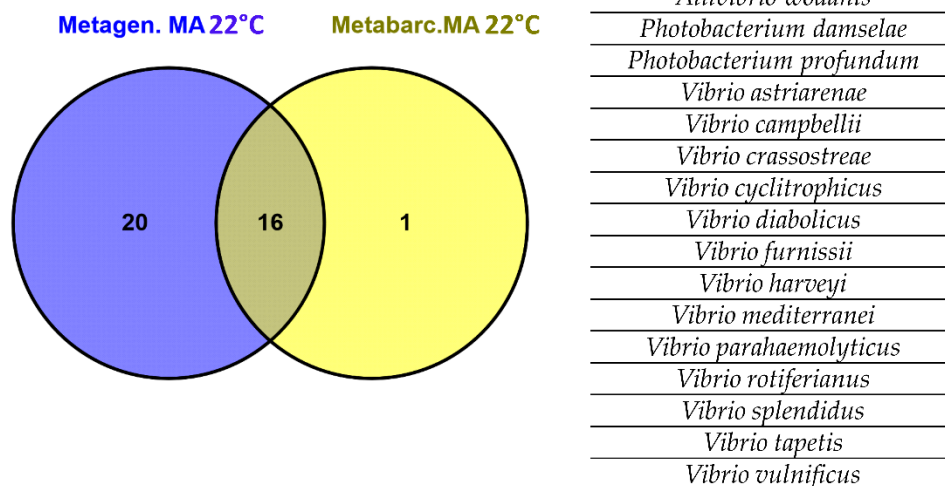

**Figure S3.** Venn diagram showing the number of species identified in clam samples plated in MA medium and incubated at 22 °C, according to shotgun metagenomics and *recA-pyrH* metabarcoding. The table reports the details of the 16 species shared between the two methods. MA 22 °C: clam samples plated on marine agar media and incubated at 22 °C.

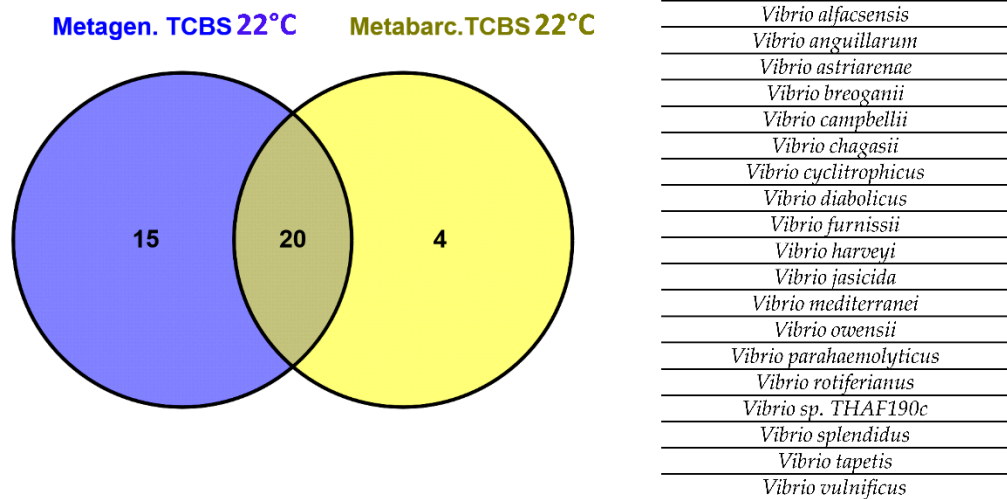

**Figure S4.** Venn diagram showing the number of species identified in clam samples plated in TCBS medium and incubated at 22° C, according to shotgun metagenomics and *recA-pyrH* metabarcoding. TCBS 22 °C: clam samples plated on thiosulfate-citrate-bile salts-sucrose agar and incubated at 22 °C.

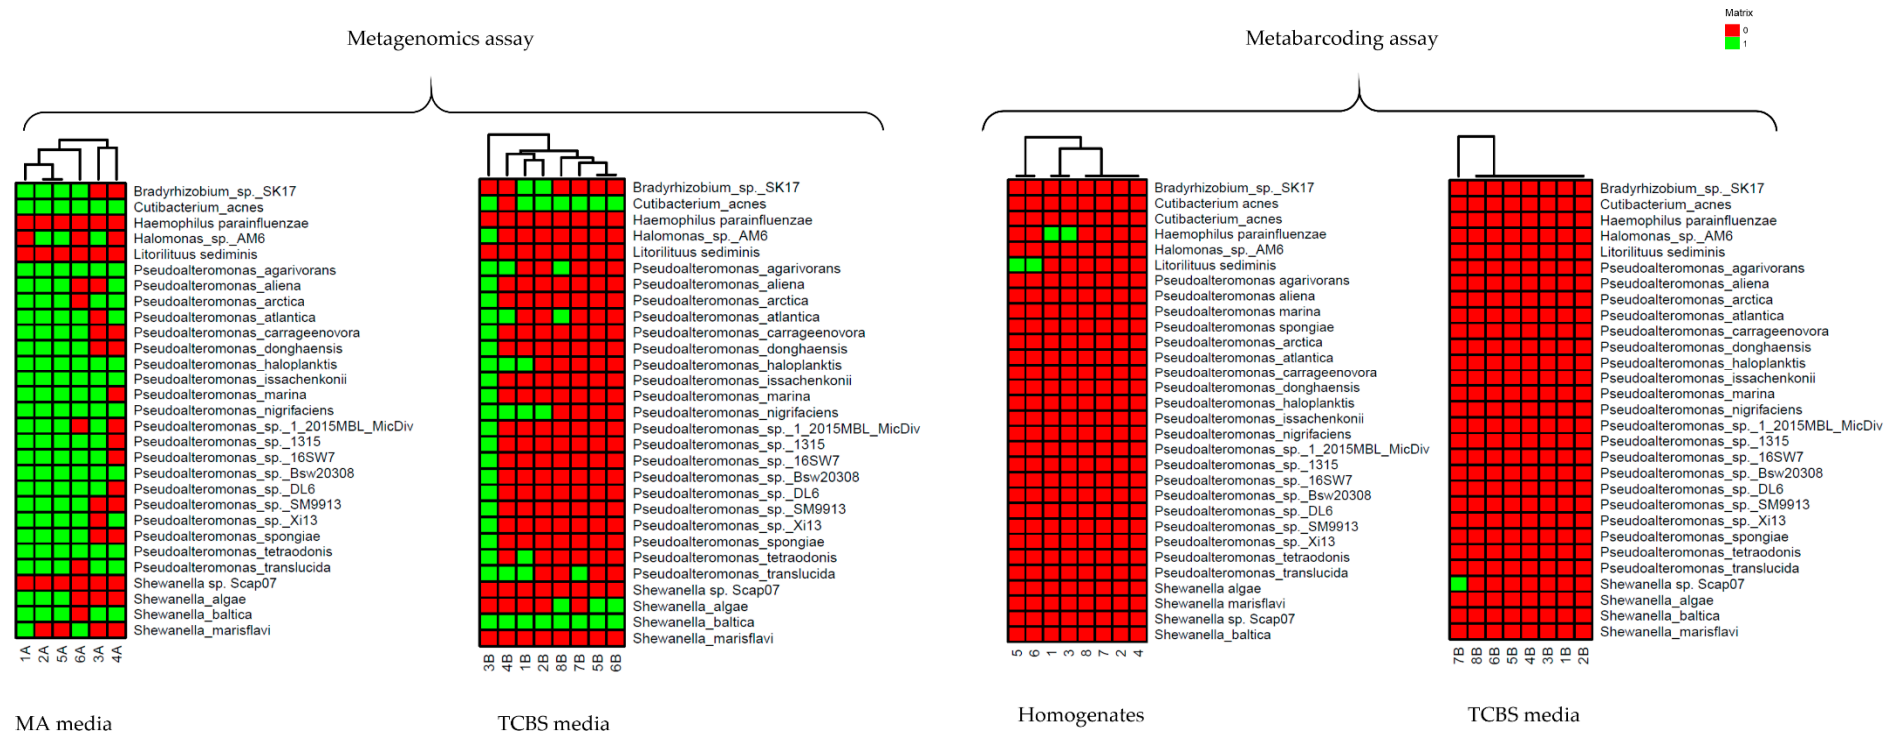

**Figure S5.** Heat map showing the presence (green) and absence (red) of marine bacteria, *Vibrio* species ex-cluded, found in clam samples according to metagenomics and *recA-pyrH* metabarcoding.

**Table S1.** Summary of the total 54 clam samples collected during summer and winter seasons. Samples are subdivided according to the culture-independent and -dependent methods. Clam samples were plated on the following: A: MA22 °C, Marine agar incubated at 22 °C; B: TCBS 22 °C, Thiosulfate-citrate-bile salts-sucrose agar incubated at 22 °C; C: CV 22 °C, CHROMagar Vibrio media incubated at 22 °C; D: TCBS 37 °C, Thiosulfate-citrate-bile salts-sucrose agar incubated at 37 °C. Sampling season: Summer; Winter. Sampling sites: CH: Chioggia; CO: Colmata; GO: Goro; MA: Marano; PM: Porto Marghera; SC: Scardovari. 1: Pre-depuration samples; 2: Post-depuration samples.

| Sites | Season | Depuration | CULTURE-<br>INDEPENDENT |          | CULTURE-<br>DEPENDENT |            |           |           |           |
|-------|--------|------------|-------------------------|----------|-----------------------|------------|-----------|-----------|-----------|
|       |        |            | Homogenates             | MA22 °C  |                       | TCBS 22 °C |           | TCBS 37°C | CV22 °C   |
|       |        |            |                         | Metagen. | Metabarc.             | Metagen.   | Metabarc. | Metabarc. | Metabarc. |
| CH    | Summer | 1          | 1                       | 1A       | 1A                    | 1B         | 1B        | 1D        |           |
| CH    | Summer | 2          | 2                       | 2A       | 2A                    | 2B         | 2B        | 2D        |           |
| CH    | Winter | 1          | 3                       | *        | 3A                    | 3B         | 3B        |           | 3C        |
| CH    | Winter | 2          | 4                       | 4A       | 4A                    | 4B         | 4B        |           | 4C        |
| PM    | Summer | 1          | 5                       | 5A       | 5A                    | 5B         | 5B        | 5D        |           |
| PM    | Summer | 2          | 6                       | 6A       | 6A                    | 6B         | 6B        | 6D        |           |
| PM    | Winter | 1          | 7                       | *        | 7A                    | 7B         | 7B        |           | 7C        |
| PM    | Winter | 2          | 8                       | *        | 8A                    | 8B         | 8B        |           | 8C        |
| SC    | Summer | 1          |                         |          | 9A                    |            | 9B        | 9D        |           |
| SC    | Summer | 2          |                         |          | 10A                   |            | 10B       | 10D       |           |
| CO    | Summer | 1          | 11                      |          | 11A                   |            | 11B       | 11D       |           |
| CO    | Summer | 2          | 12                      |          | 12A                   |            | 12B       | 12D       |           |
| GO    | Summer | 1          |                         |          | 13A                   |            | 13B       | 13D       |           |
| GO    | Summer | 2          |                         |          | 14A                   |            | 14B       | 14D       |           |
| MA    | Summer | 1          | 15                      |          | 15A                   |            | 15B       | 15D       |           |
| MA    | Summer | 2          | 16                      |          | 16A                   |            | 16B       | 16D       |           |
| CH    | Winter | 1          | 17                      |          | 17A                   |            | 17B       |           | 17C       |
| CH    | Winter | 2          | 18                      |          | 18A                   |            | 18B       |           | 18C       |
| CH    | Winter | 1          | 19                      |          | 19A                   |            | 19B       |           | 19C       |
| CH    | Winter | 2          | 20                      |          | 20A                   |            | 20B       |           | 20C       |
| CH    | Winter | 1          | 21                      |          | 21A                   |            | 21B       |           | 21C       |
| CH    | Winter | 2          | 22                      |          | 22A                   |            | 22B       |           | 22C       |

|    |        |   |           |     |     |     |
|----|--------|---|-----------|-----|-----|-----|
| PM | Winter | 1 | <b>23</b> | 23A | 23B | 23C |
| PM | Winter | 2 | <b>24</b> | 24A | 24B | 24C |
| SC | Winter | 1 | <b>25</b> | 25A | 25B | 25C |
| SC | Winter | 2 | <b>26</b> | 26A | 26B | 26C |
| SC | Winter | 1 | <b>27</b> | 27A | 27B | 27C |
| SC | Winter | 2 | <b>28</b> | 28A | 28B | 28C |
| CO | Winter | 1 | <b>29</b> | 29A | 29B | 29C |
| CO | Winter | 2 | <b>30</b> | 30A | 30B | 30C |
| CO | Winter | 1 | <b>31</b> | 31A | 31B | 31C |
| CO | Winter | 2 | <b>32</b> | 32A | 32B | 32C |
| GO | Winter | 1 | <b>33</b> | 33A | 33B | 33C |
| GO | Winter | 2 | <b>34</b> | 34A | 34B | 34C |
| GO | Winter | 1 | <b>35</b> | 35A | 35B | 35C |
| GO | Winter | 2 | <b>36</b> | 36A | 36B | 36C |
| MA | Winter | 1 | <b>37</b> | 37A | 37B | 37C |
| MA | Winter | 2 | <b>38</b> | 38A | 38B | 38C |
| MA | Winter | 1 | <b>39</b> | 39A | 39B | 39C |
| MA | Winter | 2 | <b>40</b> | 40A | 40B | 40C |
| CH | Summer | 1 | <b>41</b> | 41A | 41B | 41D |
| CH | Summer | 2 | <b>42</b> | 42A | 42B | /   |
| CH | Summer | 1 | <b>43</b> | 43A | 43B | 43D |
| CH | Summer | 2 | <b>44</b> | 44A | 44B | 44D |
| PM | Summer | 1 | <b>45</b> | 45A | 45B | 45D |
| PM | Summer | 2 | <b>46</b> | 46A | 46B | 46D |
| SC | Summer | 1 | <b>47</b> | 47A | /   | /   |
| SC | Summer | 2 | <b>48</b> | 48A | 48B | 48D |
| CO | Summer | 1 | <b>49</b> | 49A | 49B | 49D |
| CO | Summer | 2 | <b>50</b> | 50A | 50B | 50D |
| GO | Summer | 1 | <b>51</b> | 51A | /   | /   |
| GO | Summer | 2 | <b>52</b> | 52A | 52B | 52D |
| MA | Summer | 1 | <b>53</b> | 53A | 53B | 53D |

|    |        |   |    |     |     |   |
|----|--------|---|----|-----|-----|---|
| MA | Summer | 2 | 54 | 54A | 54B | / |
|----|--------|---|----|-----|-----|---|

\* Metagenomics samples not included in the study because of the low quality reads

/ Plated clam samples not included on the analysis because the number of grown colonies was below 10

Metagen.: Metagenomics

Metabarc.: Metabarcoding



**Table S2.** Fleiss' kappa agreement of *Vibrio* species detection in homogenate and clam samples plated and incubated at 22 °C on MA and TCBS media according to *recA-pyrH* metabarcoding. The *Vibrio* species with a significant statistical Fleiss' kappa are shown in bold. Fleiss' kappa values agreement interpretation:  $k < 0$ —poor;  $k = 0.01–0.20$ —slight;  $k = 0.21–0.40$ —fair;  $k = 0.41–0.60$ —moderate;  $k = 0.61–0.80$ —substantial;  $k = 0.81–1$ —almost perfect

| Species                                                                          | Fleiss 'kappa | Agreement          | <i>p</i> -value |
|----------------------------------------------------------------------------------|---------------|--------------------|-----------------|
| <i>Aliivibrio fischeri</i>                                                       | 0.051         | Slight             | 0.544           |
| <i>Aliivibrio wodanis</i>                                                        | 0.133         | Slight             | 0.111           |
| <b><i>Photobacterium damsela</i></b>                                             | <b>0.226</b>  | <b>Fair</b>        | <b>0.007</b>    |
| <b><i>Photobacterium gaetbulicola</i>/<br/><i>Photobacterium rosenbergii</i></b> | <b>0.409</b>  | <b>Moderate</b>    | <b>0.001</b>    |
| <b><i>Photobacterium profundum</i></b>                                           | <b>0.493</b>  | <b>Moderate</b>    | <b>0.001</b>    |
| <b><i>Vibrio alfacensis</i></b>                                                  | <b>0.4</b>    | <b>Fair</b>        | <b>0.001</b>    |
| <i>Vibrio alginolyticus</i>                                                      | 0.052         | Slight             | 0.534           |
| <i>Vibrio anguillarum</i>                                                        | 0.074         | Slight             | 0.378           |
| <b><i>Vibrio astriarenae</i></b>                                                 | <b>0.57</b>   | <b>Moderate</b>    | <b>0.001</b>    |
| <i>Vibrio atlanticus</i>                                                         | 0.114         | Slight             | 0.171           |
| <b><i>Vibrio azureus</i></b>                                                     | <b>0.493</b>  | <b>Moderate</b>    | <b>0.001</b>    |
| <b><i>Vibrio breoganii</i></b>                                                   | <b>0.181</b>  | <b>Slight</b>      | <b>0.029</b>    |
| <i>Vibrio campbellii</i>                                                         | 0.14          | Slight             | 0.09            |
| <i>Vibrio casei</i>                                                              | -0.07         | Poor               | 0.933           |
| <i>Vibrio chagasii</i>                                                           | 0.15          | Slight             | 0.072           |
| <i>Vibrio cholerae</i>                                                           | 0.031         | Slight             | 0.73            |
| <i>Vibrio cidicii</i>                                                            | -0.07         | Poor               | 0.933           |
| <i>Vibrio crassostreae</i>                                                       | 0.108         | Slight             | 0.195           |
| <i>Vibrio cyclitrophicus</i>                                                     | -0.055        | Poor               | 0.519           |
| <b><i>Vibrio diabolicus</i></b>                                                  | <b>0.367</b>  | <b>Fair</b>        | <b>0.001</b>    |
| <i>Vibrio europaeus</i>                                                          | -0.014        | Poor               | 0.843           |
| <i>Vibrio fluvialis</i>                                                          | -0.042        | Poor               | 0.647           |
| <i>Vibrio furnissii</i>                                                          | 0.107         | Slight             | 0.199           |
| <b><i>Vibrio harveyi</i></b>                                                     | <b>0.718</b>  | <b>Substantial</b> | <b>0.001</b>    |
| <i>Vibrio jasicida</i>                                                           | -0.036        | Poor               | 0.666           |
| <b><i>Vibrio mediterranei</i></b>                                                | <b>0.676</b>  | <b>Substantial</b> | <b>0.001</b>    |
| <i>Vibrio nigripulchritudo</i>                                                   | -0.014        | Poor               | 0.866           |
| <i>Vibrio owensii</i>                                                            | 0.033         | Slight             | 0.696           |
| <i>Vibrio panuliri</i>                                                           | 0.133         | Slight             | 0.199           |
| <b><i>Vibrio parahaemolyticus</i></b>                                            | <b>0.477</b>  | <b>Moderate</b>    | <b>0.001</b>    |
| <i>Vibrio ponticus</i>                                                           | -0.021        | Poor               | 0.966           |
| <b><i>Vibrio rotiferianus</i></b>                                                | <b>0.543</b>  | <b>Moderate</b>    | <b>0.001</b>    |
| <i>Vibrio rumoiensis</i>                                                         | -0.021        | Poor               | 0.966           |
| <i>Vibrio scopthalmi</i>                                                         | -0.026        | Poor               | 0.866           |
| <i>Vibrio</i> sp. Scap24                                                         | -0.021        | Poor               | 0.966           |
| <i>Vibrio</i> sp. THAF100                                                        | -0.014        | Poor               | 0.966           |
| <i>Vibrio</i> sp. THAF190c                                                       | 0.107         | Slight             | 0.299           |
| <b><i>Vibrio splendidus</i></b>                                                  | <b>0.379</b>  | <b>Fair</b>        | <b>0.001</b>    |
| <b><i>Vibrio tapetis</i></b>                                                     | <b>0.358</b>  | <b>Fair</b>        | <b>0.001</b>    |
| <b><i>Vibrio tubiashii</i></b>                                                   | <b>0.493</b>  | <b>Moderate</b>    | <b>0.001</b>    |

|                          |       |          |       |
|--------------------------|-------|----------|-------|
| <i>Vibrio vulnificus</i> | 0.454 | Moderate | 0.001 |
|--------------------------|-------|----------|-------|

**Table S3.** Resulting sequencing depth obtained by the shotgun metagenomics

| <b>Sample</b> | <b>Total raw reads</b> |
|---------------|------------------------|
| 1A            | 14067580               |
| 1B            | 10467200               |
| 2A            | 7223358                |
| 2B            | 12635596               |
| 3B            | 11110382               |
| 4A            | 11772854               |
| 4B            | 9922952                |
| 5A            | 9991516                |
| 5B            | 4175460                |
| 6A            | 504008                 |
| 6B            | 8678986                |
| 7B            | 11407522               |
| 8B            | 9820130                |
